# Supplementary material
Source: PubMed Central journal article supplement (PMC5771887)
Supplement: NIHMS914887-supplement-Supp_info.pdf [file NIHMS914887-supplement-Supp_info.pdf]

# Supplementary Material for: Measuring Precision in Bioassays: Re-thinking Assay Validation

by Michael P. Fay, Michael C. Sachs, and Kazutoyo Miura

## Summary

As a convenience for the reader, we collect some basic statistical results from normal models that are used in the main paper. The only non-standard result is that we have defined and derived the log-centered confidence intervals for the constant coefficient of variation model.

## S1 Normal Constant Standard Deviation Model

### S1.1 Tests and One-sided Confidence Limits on $\sigma$

Let  $Y_1, \dots, Y_n$  be independent with  $Y_i \sim N(\mu, \sigma^2)$ . Let  $s^2$  be the usual unbiased variance estimate, and let  $S^2$  be the associated random variable. Then

$$\frac{(n-1)S^2}{\sigma^2} \sim W_{n-1}, \tag{S1}$$

where  $W_{n-1}$  is the cumulative distribution of a chi-squared distribution with  $n-1$  degrees of freedom. Then a  $100(1-\alpha)\%$  one-sided confidence interval for  $\sigma^2$  is

$$\left[ 0, \frac{(n-1)s^2}{W_{n-1}^{-1}(\alpha)} \right], \tag{S2}$$

where  $W_{n-1}^{-1}(a)$  be the  $a$ th quantile of that chi-squared distribution.

### S1.2 Confidence Intervals on $\mu$ When $\sigma$ is Known

If  $\sigma$  is known then a  $100(1-\alpha)\%$  confidence interval for  $\mu$  is

$$C_\mu(y; 1-\alpha, \sigma) = [y - \Phi^{-1}(1-\alpha/2)\sigma, y + \Phi^{-1}(1-\alpha/2)\sigma]. \tag{S3}$$

where  $\Phi^{-1}(a)$  is the  $a$ th quantile of the standard normal distribution.

## S2 Normal Constant Coefficient of Variation Model

### S2.1 Testing and One-sided Limits for $\theta$

Consider the normal constant CV model, where  $Y \sim N(\mu, \sigma^2)$ , and the coefficient of variation is  $\theta = \sigma/\mu$ . We assume  $\mu > 0$ . Observe a sample of  $n$  independent observations,  $y_1, \dots, y_n$ .

Let  $\hat{\theta} = \frac{\hat{\sigma}}{\bar{y}}$ , where  $\hat{\sigma}^2$  is the unbiased sample variance estimate and  $\bar{y}$  is the sample mean. Then  $T = \sqrt{n}/\hat{\theta}$  is distributed non-central t with  $n - 1$  degrees of freedom and non-centrality parameter  $\sqrt{n}/\theta$ . To test  $H_0 : \theta \geq \theta_0$  versus  $H_1 : \theta < \theta_0$ , we reject at the  $\alpha$  level when  $T > t_{n-1, \delta}^{-1}(1 - \alpha)$ , where  $\delta = \sqrt{n}/\theta_0$  and  $t_{df, ncp}^{-1}(a)$  is the  $a$ th quantile of the non-central t with  $df$  degrees of freedom and non-centrality parameter  $ncp$ . This is equivalent to rejecting when

$$\hat{\theta} \leq \frac{\sqrt{n}}{t_{n-1, \delta}^{-1}(1 - \alpha)}.$$

A  $100(1 - \alpha_\ell)\%$  upper confidence limit for  $\theta$  is the value  $\bar{\theta}$  corresponding to the  $\theta_0$  that just barely rejects, in other words the value  $\bar{\theta}$  that solves,

$$t_{n-1, \sqrt{n}/\bar{\theta}}^{-1}(1 - \alpha_\ell) = \frac{\sqrt{n}}{\bar{\theta}}. \quad (\text{S4})$$

## S2.2 Log-centered CIs on $\mu$ When $\theta$ is Known

In this section, assume that  $\theta$  is known. We derive a  $100(1 - \alpha)\%$  confidence interval for  $\mu$  using the intersection of two one-sided confidence intervals,

$$C_\mu(y; 1 - \alpha, \theta, f) = [\underline{\mu}(y; 1 - \alpha_L, \theta), \bar{\mu}(y; 1 - \alpha_U, \theta)].$$

where  $\alpha_L + \alpha_U = \alpha$ . First, a  $(1 - \alpha_L)$  one-sided lower confidence limit is

$$\underline{\mu}(y; 1 - \alpha_L, \theta) = \frac{y}{\theta\Phi^{-1}(1 - \alpha_L) + 1} \quad (\text{S5})$$

where  $\Phi^{-1}(q)$  is the  $q$ th quantile of a standard normal. This can be shown using the fact that since  $Y \sim N(\mu, \sigma^2)$  and we have assumed  $\mu > 0$ , then  $Y/\mu \sim N(1, \theta^2)$ . Thus,

$$\begin{aligned} 1 - \alpha_L &= Pr \left[ \frac{Y}{\mu} - 1 \leq \Phi^{-1}(1 - \alpha_L) \right] \\ &= Pr \left[ \frac{Y}{\mu} \leq \theta\Phi^{-1}(1 - \alpha_L) + 1 \right] \\ &= Pr \left[ \frac{Y}{\theta\Phi^{-1}(1 - \alpha_L) + 1} \leq \mu \right]. \end{aligned}$$

To derive the  $100(1 - \alpha_U)\%$  upper limit, first consider the case where  $\theta\Phi^{-1}(1 - \alpha_U) < 1$ , so that

$$\begin{aligned} 1 - \alpha_U &= Pr \left[ -\Phi^{-1}(1 - \alpha_U) \leq \frac{Y}{\mu} - 1 \right] \\ &= Pr \left[ -\theta\Phi^{-1}(1 - \alpha_U) + 1 \leq \frac{Y}{\mu} \right] \\ &= Pr \left[ \mu \leq \frac{Y}{1 - \theta\Phi^{-1}(1 - \alpha_U)} \right]. \end{aligned}$$

so that (when  $\theta\Phi^{-1}(1 - \alpha_U) < 1$ )

$$\bar{\mu}(y; 1 - \alpha_U, \theta) = \frac{y}{1 - \theta\Phi^{-1}(1 - \alpha_U)} \quad (\text{S6})$$

Let  $\alpha_L = f\alpha$  and  $\alpha_U = (1 - f)\alpha$ , where  $f \in (0, 1)$ . Then

$$C_\mu(y; 1 - \alpha, \theta, f) = \left[ \frac{y}{1 + \theta\Phi^{-1}(1 - \alpha_L)}, \frac{y}{1 - \theta\Phi^{-1}(1 - \alpha_U)} \right] \quad (\text{S7})$$

if  $\theta\Phi^{-1}(1 - \alpha_U) < 1$ , otherwise we define the upper limit as  $\infty$  and set  $f = 1$ . If  $f = 0.5$  so that  $\alpha_L = \alpha_U = \alpha/2$ , we call this interval a central one, meaning that both one-sided error rates are equal and bounded at  $\alpha/2$ .

We define a log-centered interval, as a confidence interval for  $\log(\mu)$  of the form  $\log(y) \pm r$ . Taking the log of both confidence limits in equation S7, we get

$$\left[ \log(y) - \log \{1 + \theta\Phi^{-1}(1 - \alpha_L)\}, \log(y) - \log \{1 - \theta\Phi^{-1}(1 - \alpha_U)\} \right]$$

or equivalently,

$$\left[ \log(y) - \log \{1 + \theta\Phi^{-1}(1 - \alpha f)\}, \log(y) + \log \left\{ \frac{1}{1 - \theta\Phi^{-1}(1 - \alpha[1 - f])} \right\} \right].$$

In other words, if there is an  $f$  that gives

$$1 + \theta\Phi^{-1}(1 - \alpha f) = \frac{1}{1 - \theta\Phi^{-1}(1 - \alpha[1 - f])},$$

then we define that  $f$  as  $f_{logc}$  and get a log-centered interval with

$$r(\theta, 1 - \alpha) = \log \{1 + \theta\Phi^{-1}(1 - \alpha f_{logc})\} = \log \left\{ \frac{1}{1 - \theta\Phi^{-1}(1 - \alpha[1 - f_{logc}])} \right\}. \quad (\text{S8})$$

If a log-centered interval exists, it will not be a central interval.

As mentioned previously, if  $\theta\Phi^{-1}(1 - \alpha) > 1$  then we cannot get a log-centered interval and we set  $\bar{\mu} \equiv \infty$ . Additionally, if  $f$  gets very close to 0, then the lower limit approaches 0. So we may have  $\underline{\mu} = 0$  due to computer rounding, in which case we cannot write the confidence interval as a log-centered one.

## S3 Lognormal Constant Coefficient of Variation Model

### S3.1 Confidence Interval on $\theta$ from Log Normal Model with Constant Coefficient of Variation

Assume  $Y_1, \dots, Y_n$  are independent and all distributed lognormal, so that  $Z_i = \log(Y_i) \sim N(\xi, \nu)$ . In terms of  $\mu$  and  $\sigma$  we have

$$E(Y_i) = \mu = \exp\left(\xi + \frac{\nu}{2}\right) \quad \text{and} \quad \text{Var}(Y_i) = \sigma^2 = \mu^2 \{\exp(\nu) - 1\}$$

so that

$$\theta = \frac{\sigma}{\mu} = \sqrt{\exp(\nu) - 1}. \quad (\text{S9})$$

Then since  $Z_1, \dots, Z_n$  are normal with variance  $\nu$ , and since  $\theta$  is a monotonic function of  $\nu$ , we can use the normal methods (see Section S1.1) to test the null that  $\theta \geq \theta_0$ . In other words, the null,  $H_0 : \theta \geq \theta_0$ , can be equivalently be written as the null,  $H_0 : \sqrt{\exp(\nu) - 1} \geq \sqrt{\exp(\nu_0) - 1}$  where  $\theta_0 = \sqrt{\exp(\nu_0) - 1}$ . Or equivalently, as  $H_0 : \nu \geq \nu_0$ .

Let  $s_z^2$  be the sample variance of the  $Z_i$ . Then following Section S1.1 we reject the null (in any of its parameterizations) at the  $\alpha_\ell$  level whenever

$$s_z^2 \leq \frac{\nu_0 W_{n-1}^{-1}(\alpha_\ell)}{n-1}$$

or equivalently

$$\tilde{\theta} = \sqrt{\exp(s_z^2) - 1} \leq \sqrt{(\theta_0^2 + 1)^{\frac{W_{n-1}^{-1}(\alpha_\ell)}{n-1}} - 1}. \quad (\text{S10})$$

When  $\frac{W_{n-1}^{-1}(\alpha)}{n-1} = 1$  or equivalently, when  $\alpha = \alpha_\ell = W_{n-1}(n-1)$  then this is the same as rejecting when  $\tilde{\theta} \leq \theta_0$ . Thus, a  $(1 - \alpha_\ell)\%$  one-sided confidence limit on  $\theta$  is the value of  $\theta_0$  that just barely rejects. In other words,

$$\bar{\theta}(1 - \alpha_\ell) = \sqrt{-1 + \exp\left(\frac{(n-1)s_z^2}{W_{n-1}^{-1}(\alpha_\ell)}\right)}. \quad (\text{S11})$$

### S3.2 Confidence Interval on $\mu$ from Log Normal Model with Known Constant Coefficient of Variation

Now consider the confidence interval for  $\mu$  when  $\nu$  is known. First, let  $\underline{\xi}(z) = z - \sqrt{\nu}\Phi^{-1}(1 - \alpha_L)$  and  $\bar{\xi}(z) = z + \sqrt{\nu}\Phi^{-1}(1 - \alpha_U)$  be the lower and upper limits of a  $100(1 - \alpha)\%$  confidence interval for  $\xi$ , where  $\alpha_L + \alpha_U = \alpha$ . Then

$$\begin{aligned} 1 - \alpha &= Pr [\underline{\xi}\{Z\} \leq \xi \leq \bar{\xi}\{Z\}] \\ &= Pr \left[ \exp\left(\underline{\xi}\{Z\} + \frac{\nu}{2}\right) \leq \mu \leq \exp\left(\bar{\xi}\{Z\} + \frac{\nu}{2}\right) \right] \end{aligned}$$

since  $\mu = \exp(\xi + \nu/2)$ . We use  $\nu = \log(\theta^2 + 1)$  to get the confidence interval. In other words, the  $100(1 - \alpha)\%$  confidence interval for  $\mu$  is the union of the two one-sided confidence intervals, giving  $(\underline{\mu}(y; 1 - \alpha_L), \bar{\mu}(y; 1 - \alpha_U))$ . Using  $\alpha_L = f\alpha$  and  $\alpha_U = (1 - f)\alpha$ , we rewriting the intervals as

$$\underline{\mu}(y; 1 - \alpha f) = \exp\{\log(y) - r_L\},$$

where  $r_L = \sqrt{\nu}\Phi^{-1}(1 - \alpha f) - \nu/2$ , and

$$\bar{\mu}(y; 1 - \alpha(1 - f)) = \exp\{\log(y) - r_U\},$$

where  $r_U = \sqrt{\nu}\Phi^{-1}(1 - \alpha(1 - f)) + \nu/2$ . We can get a log-centered interval by solving for the  $f \in (0, 0.5)$  that solves  $r_L = r_U$ , or equivalently the  $f_{logc}$  that solves

$$\Phi^{-1}(1 - \alpha f_{logc}) - \Phi^{-1}(1 - \alpha(1 - f_{logc})) = \sqrt{\nu}.$$

Thus, the effective standard deviation of  $\log(Y)$  is  $r(\theta, 0.6827)$ , where

$$r(\theta, 1 - \alpha) = \sqrt{\nu}\Phi^{-1}(1 - \alpha(1 - f)) + \nu/2, \quad (\text{S12})$$

and from equation S9,  $\nu = \log(\theta^2 + 1)$ .

## S4 Proof that Coverage of Log-Centered Confidence Intervals Do Not Depend on $\mu$ Values

We want to show that, given  $\theta$ , the following does not depend on  $\mu(x_1), \dots, \mu(m)$  or  $\mu^* = \mu(x^*)$ :

$$\begin{aligned} \Pi(1 - \gamma) &= Pr [\log(Y^*) - r(\bar{\theta}(\mathbf{Y}, q), 1 - \gamma) \leq \log(\mu^*) \leq \log(Y^*) + r(\bar{\theta}(\mathbf{Y}, q), 1 - \gamma)] \\ &= Pr [\log(Y^*/\mu) - r(\bar{\theta}(\mathbf{Y}, q), 1 - \gamma) \leq 0 \leq \log(Y^*/\mu) + r(\bar{\theta}(\mathbf{Y}, q), 1 - \gamma)]. \end{aligned}$$

The proof is completed if we show three things: (i) the distribution of  $Y^*/\mu^*$  only depends on  $\theta$ , (ii) the distribution of  $\bar{\theta}(\mathbf{Y}, q)$  only depends on  $\theta$ , and  $r(\theta, 1 - \gamma)$  only depends on  $\theta$ . We take these one-at-a-time.

(i) Show the distribution of  $Y^*/\mu$  only depends on  $\theta$ . We do this separately for the two models.

**Normal constant CV model:** We have  $Y^* \sim N(\mu^*, \sigma^2(x^*))$ . Dividing by  $\mu^*$  we get  $Y^*/\mu^* \sim N(1, \sigma^2(x^*)/\mu^{*2}) = N(1, \theta^2)$ .

**Lognormal constant CV model:** We have  $\log(Y^*) \sim N(\xi(x^*), \nu) = N(\log(\mu^*) - \nu(x^*)/2, \nu(x^*))$ , so that  $\log(Y^*) - \log(\mu^*) = \log(Y^*/\mu^*) \sim N(-\nu(x^*)/2, \nu(x^*))$ . Finally,  $\nu(x^*) = \log(\theta^2 + 1)$ .

(ii) Show the distribution of  $\bar{\theta}(\mathbf{Y}, q)$  only depends on  $\theta$ . Since  $\bar{\theta}(\mathbf{Y}, q) = \max_{j=1, \dots, m} \bar{\theta}_j(\mathbf{Y}_j, 1 - \alpha_\ell)$  where  $\alpha_\ell = (1 - q)^m$ , we just need to show that  $\bar{\theta}_j(\mathbf{Y}_j, 1 - \alpha_\ell)$  for each  $j$  depends only on  $\theta$ . We do this separately for the two models.

**Normal constant CV model:** Equation S4 gives  $\bar{\theta}_j(\mathbf{Y}_j, 1 - \alpha_\ell)$  for any level  $j$  (the  $js$  are suppressed in that section). The only random variable in equation S4 is  $\hat{\theta}$ , and we know that the distribution of  $T = \sqrt{n}/\hat{\theta}$  is non-central t with  $n - 1$  degrees of freedom and non-centrality parameter  $\sqrt{n}/\theta$ . So the distribution of  $\hat{\theta}$  only depends on  $n$  and  $\theta$ .

**Lognormal constant CV model:** From equation S11 (the  $j$ s are suppressed in that section), we see that the only random variable that  $\bar{\theta}_j(\mathbf{Y}_j, 1 - \alpha_\ell)$  depends on is  $S_z^2$  which is the sample variance of  $Z_1, \dots, Z_n$  where for each  $i = 1, \dots, n$ ,  $Z_i \sim N(\xi(x_j), \nu(x_j))$ . By standard results showing the independence of the sample variance from the mean,  $S_z^2$  depends only on  $\nu(x_j) = \log(\theta^2 + 1)$ .

(iii) Show  $r(\theta, 1 - \gamma)$  only depends on  $\theta$ .

**Normal constant CV model:** From equation S8 we see that  $r(\theta, 1 - \gamma)$  only depends on  $\theta$ , since the calculation of  $f_{logc}$  only uses  $\theta$ .

**Lognormal constant CV model:** From equation S12 we see that  $r(\theta, 1 - \gamma)$  only depends on  $\theta$ , since  $\nu = \log(\theta^2 + 1)$  and the calculation of  $f$  only uses  $\nu$ .
